# Supplementary material for: Patterns, levels and correlates of self-reported physical activity in urban black Soweto women
Source: PubMed Central journal article supplement (PMC4176558; doi:10.1186/1471-2458-14-934), 2014-09-08
Supplement: 12889_2013_7063_MOESM1_ESM.pdf [file 12889_2013_7063_MOESM1_ESM.pdf]

**Additional file 1:** Multiple regression models for anthropometric and metabolic variables using observed data

| <b>Dependent variable</b>                   | <b>N</b> | <b>Independent variables</b> | <b>Coefficients ( 95% Confidence Interval)‡</b> | <b>Beta Coefficients† (p-value)</b> | <b>Adjusted R<sup>2</sup> (p-value)</b> |
|---------------------------------------------|----------|------------------------------|-------------------------------------------------|-------------------------------------|-----------------------------------------|
| <b>Fasting blood glucose</b>                | 530      | Age                          | 0.0013 (0.0002, 0.0025)                         | 0.09 (0.03)                         | 0.02 (0.002)                            |
|                                             |          | Waist circumference          | 0.0008 (0.00001, 0.0015)                        | 0.10 (0.03)                         |                                         |
| <b>Fasting insulin</b>                      | 310      | Age                          | -0.003 (-0.006, 0.0009)                         | -0.08 (0.15)                        | 0.09                                    |
|                                             |          | Waist circumference          | 0.007 (0.004, 0.009)                            | 0.31 (<0.001)                       | (<0.001)                                |
| <b>High density lipoprotein cholesterol</b> | 455      | Age                          | -0.002 (-0.006, 0.0011)                         | -0.06 (0.18)                        | 0.02 (0.006)                            |
|                                             |          | Waist circumference          | -0.003(-0.005, -0.0004)                         | -0.12 (0.02)                        |                                         |

|                                            |     |                     |                           |               |          |
|--------------------------------------------|-----|---------------------|---------------------------|---------------|----------|
| <b>Low density lipoprotein cholesterol</b> | 455 | Age                 | 0.007 (0.004, 0.009)      | 0.26 (<0.001) | 0.11     |
|                                            |     | Waist circumference | 0.002 (0.0008, 0.004)     | 0.14 (0.002)  | (<0.001) |
| <b>Total cholesterol</b>                   | 456 | Age                 | 0.05 (0.03, 0.07)         | 0.23 (<0.001) | 0.07     |
|                                            |     | Waist circumference | 0.008 (-0.005, 0.02)      | 0.06 (0.23)   | (<0.001) |
|                                            |     | Walking for travel  | -0.0004(-0.0009, 0.00008) | -0.09 (0.05)  |          |
| <b>Systolic blood pressure</b>             | 602 | Age                 | 0.002 (0.0015, 0.003)     | 0.23 (<0.001) | 0.10     |
|                                            |     | Waist circumference | 0.0009 (0.0006, 0.001)    | 0.17 (<0.001) | (<0.001) |
| <b>Diastolic blood pressure</b>            | 599 | Age                 | 0.21 (0.11, 0.32)         | 0.13 (<0.001) | 0.07     |
|                                            |     | Waist circumference | 0.20 (0.13, 0.26)         | 0.20 (<0.001) | (<0.001) |
|                                            |     | Sitting time        | 0.001 (0.0002, 0.002)     | 0.08 (0.01)   |          |
| <b>Fat mass</b>                            | 636 | Age                 | 238 (139, 337)            | 0.18 (0.001)  | 0.05     |
|                                            |     | SES score           | 66.8 (25.5, 108)          | 0.12 (0.002)  | (<0.001) |

|                                  |     |           |                    |               |          |
|----------------------------------|-----|-----------|--------------------|---------------|----------|
| <b>Fat free soft tissue mass</b> | 636 | Age       | 13.2 (-43.4, 69.8) | 0.02 (0.65)   | 0.02     |
|                                  |     | SES score | 27.6 (3.93, 51.2)  | 0.09 (0.02)   | (<0.001) |
|                                  |     | Work MVPA | 0.69 (0.12, 1.26)  | 0.09 (0.02)   |          |
| <b>Waist circumference</b>       | 925 | Age       | 0.35 (0.25, 0.45)  | 0.21 (<0.001) | 0.04     |
|                                  |     |           |                    |               | (<0.001) |

---
